# Supplementary figures and images for: The Impact of BMI Changes on the Incidence of Glomerular Hematuria in Korean Adults: A Retrospective Study Based on the NHIS-HEALS Cohort
Source: MDPI journal article supplement (doi:10.3390/biomedicines11030989), 2023-03-22

Supplementary Figure S1.

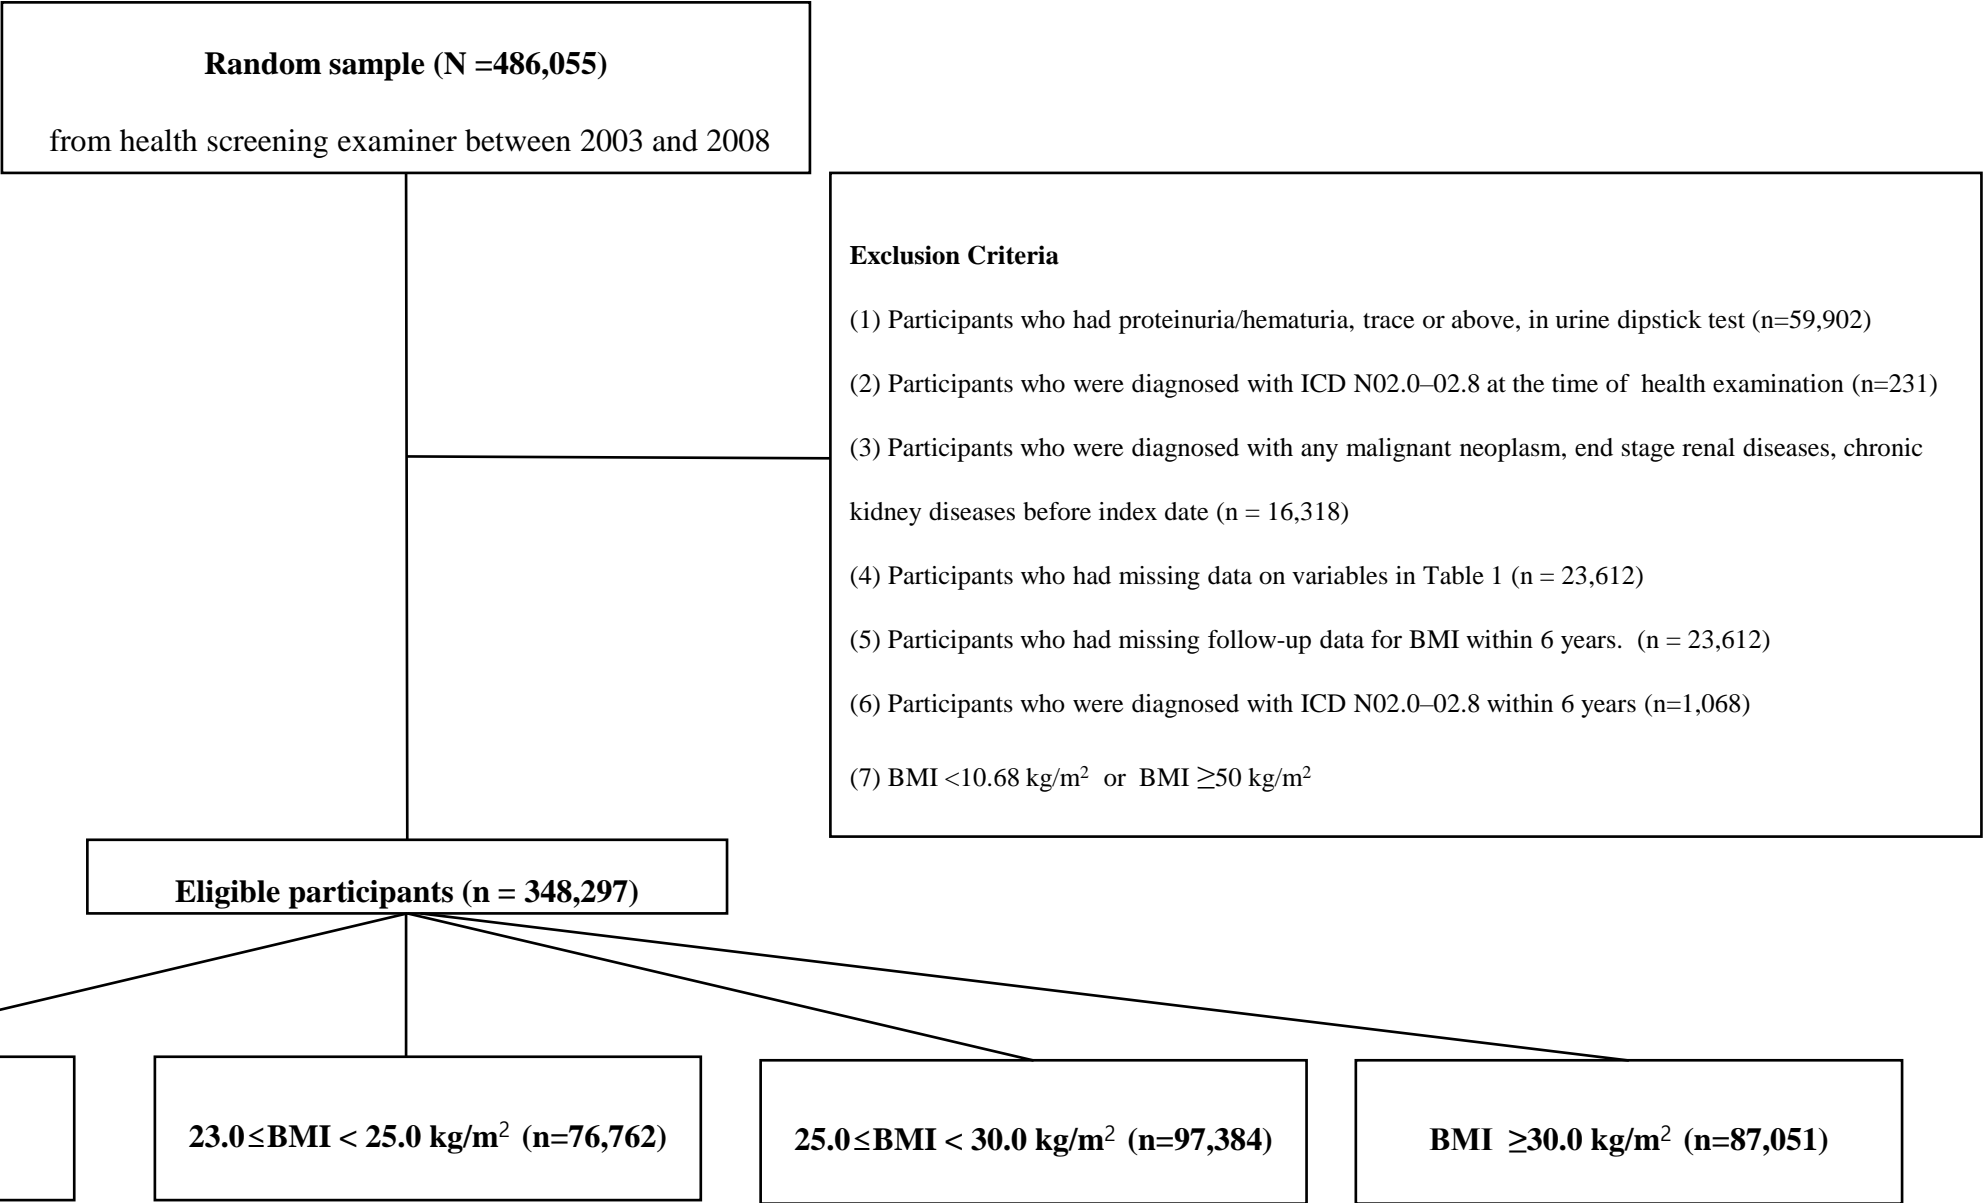

Supplement: s1 [file s1]
